# Supplementary material for: Allogeneic CD19 CAR T cells armed with an anti-rejection CD70 CAR overcome antigen escape and evade alloimmune responses
Source: Research Square preprint supplement (doi:10.21203/rs.3.rs-6157466/v1), 2025-03-20
Supplement: Supplementary file 1 [file 433b5a30a8b99ffe4b59fe91.docx]

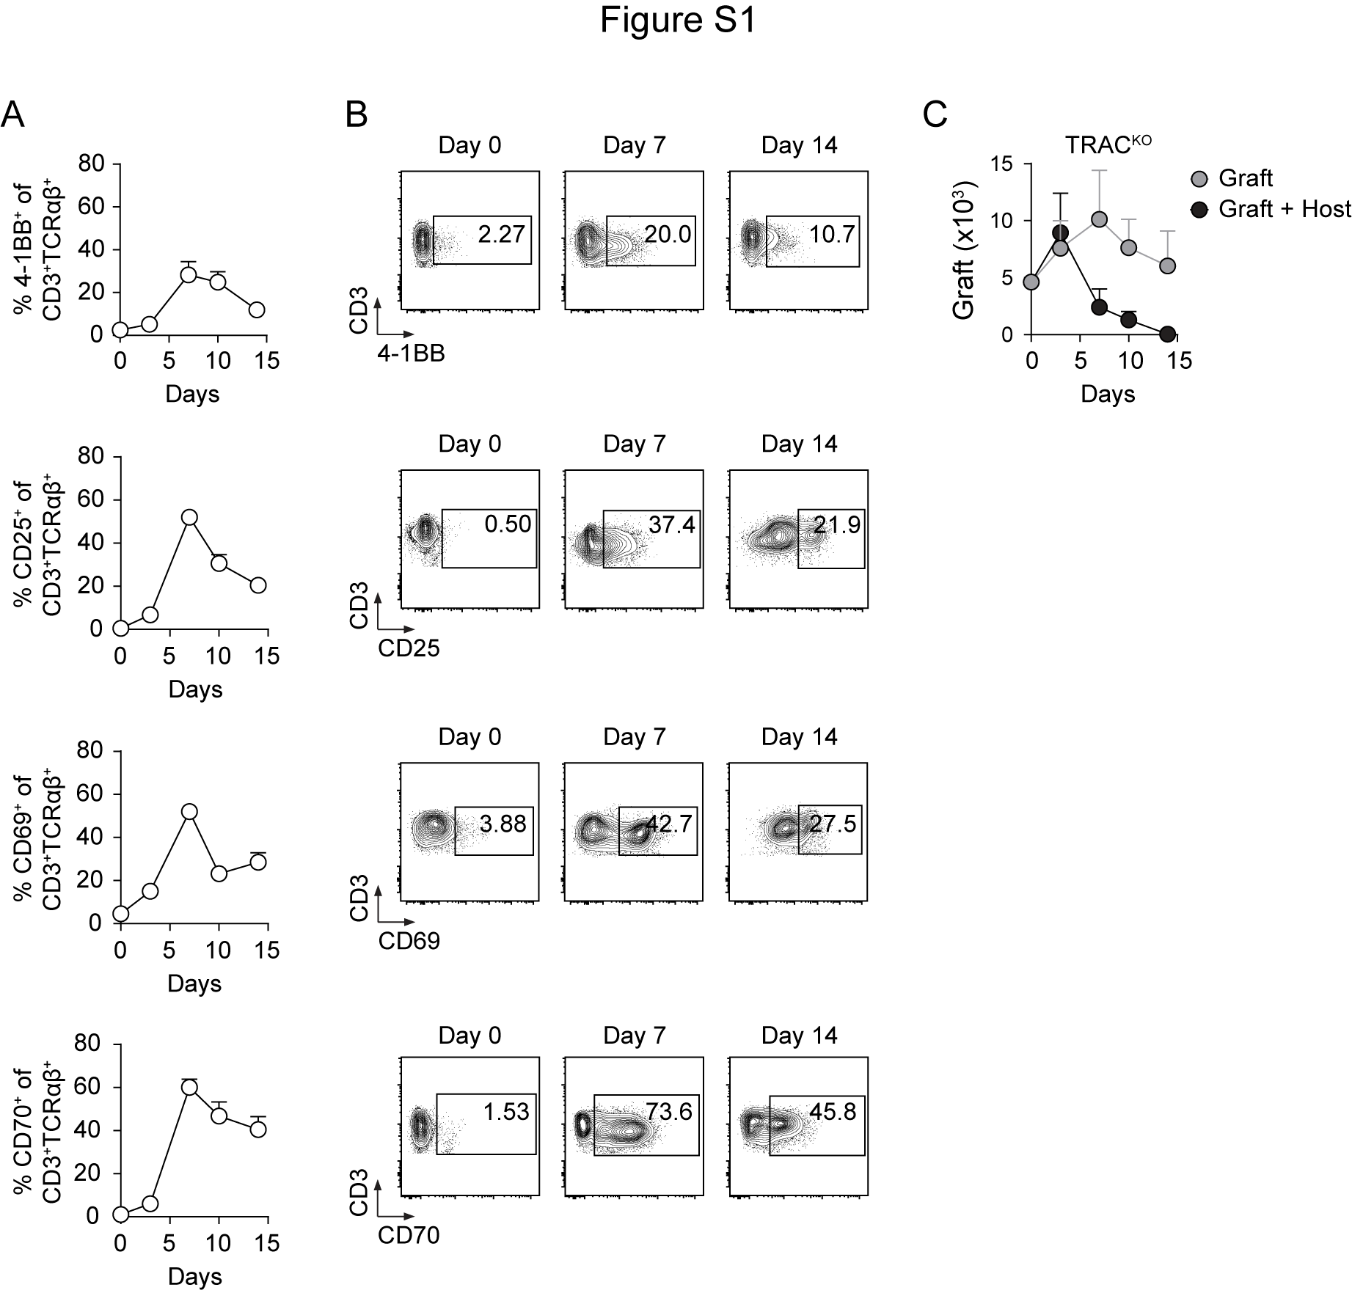
**Supplemental figures**

**Fig. S1. Kinetics of host T cell activation marker expression after *in vitro* co-culture with allogeneic graft T cells.** (**A**) Frequency of host T cells expressing activation markers overtime following co-culture with allogeneic TRACKO graft donor T cells. Data are the combined results from 7 unique graft-host donor pairs. (**B**) Representative flow cytometry plots showing activation marker expression on host T cells over time. (**C**) The absolute numbers of remaining graft T cells measured overtime. Data are the combined results from 7 unique graft-host donor pairs.

**
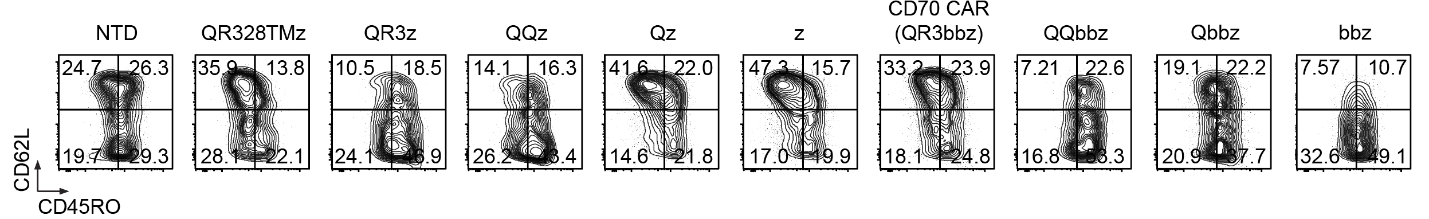
**

**Fig. S2. Phenotyping of allogeneic T cells expressing anti-rejection CD70 CAR variants.** Flow cytometry plots showing CD62L and CD45RO expression on human T cells transduced with LLVs encoding a range of CD70 CAR variants. Representative flow cytometry plots are shown within the transgene+ cell population for groups expressing a CD70 CAR.

**
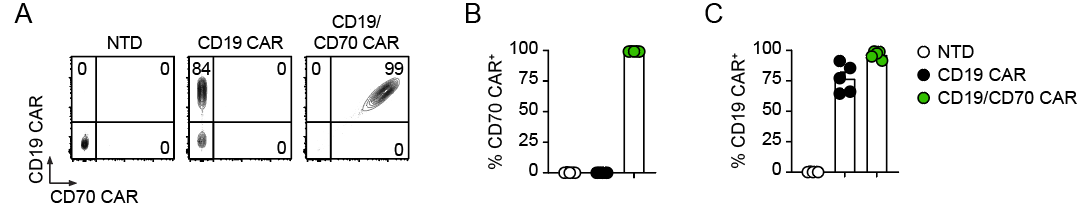
**

**Fig. S3. Phenotyping of CD19 CAR T cells co-expressing an anti-rejection CD70 CAR.** (**A**) Representative flow cytometry plots showing CD19 CAR and CD70 CAR expression on day 14 post activation. (**B**) Frequencies of CD70 CAR expressing cells on day 14 post activation are shown. (**C**) Frequencies of CD19 CAR expressing cells on day 14 post activation are shown. Symbols represent unique donors (n = 5).


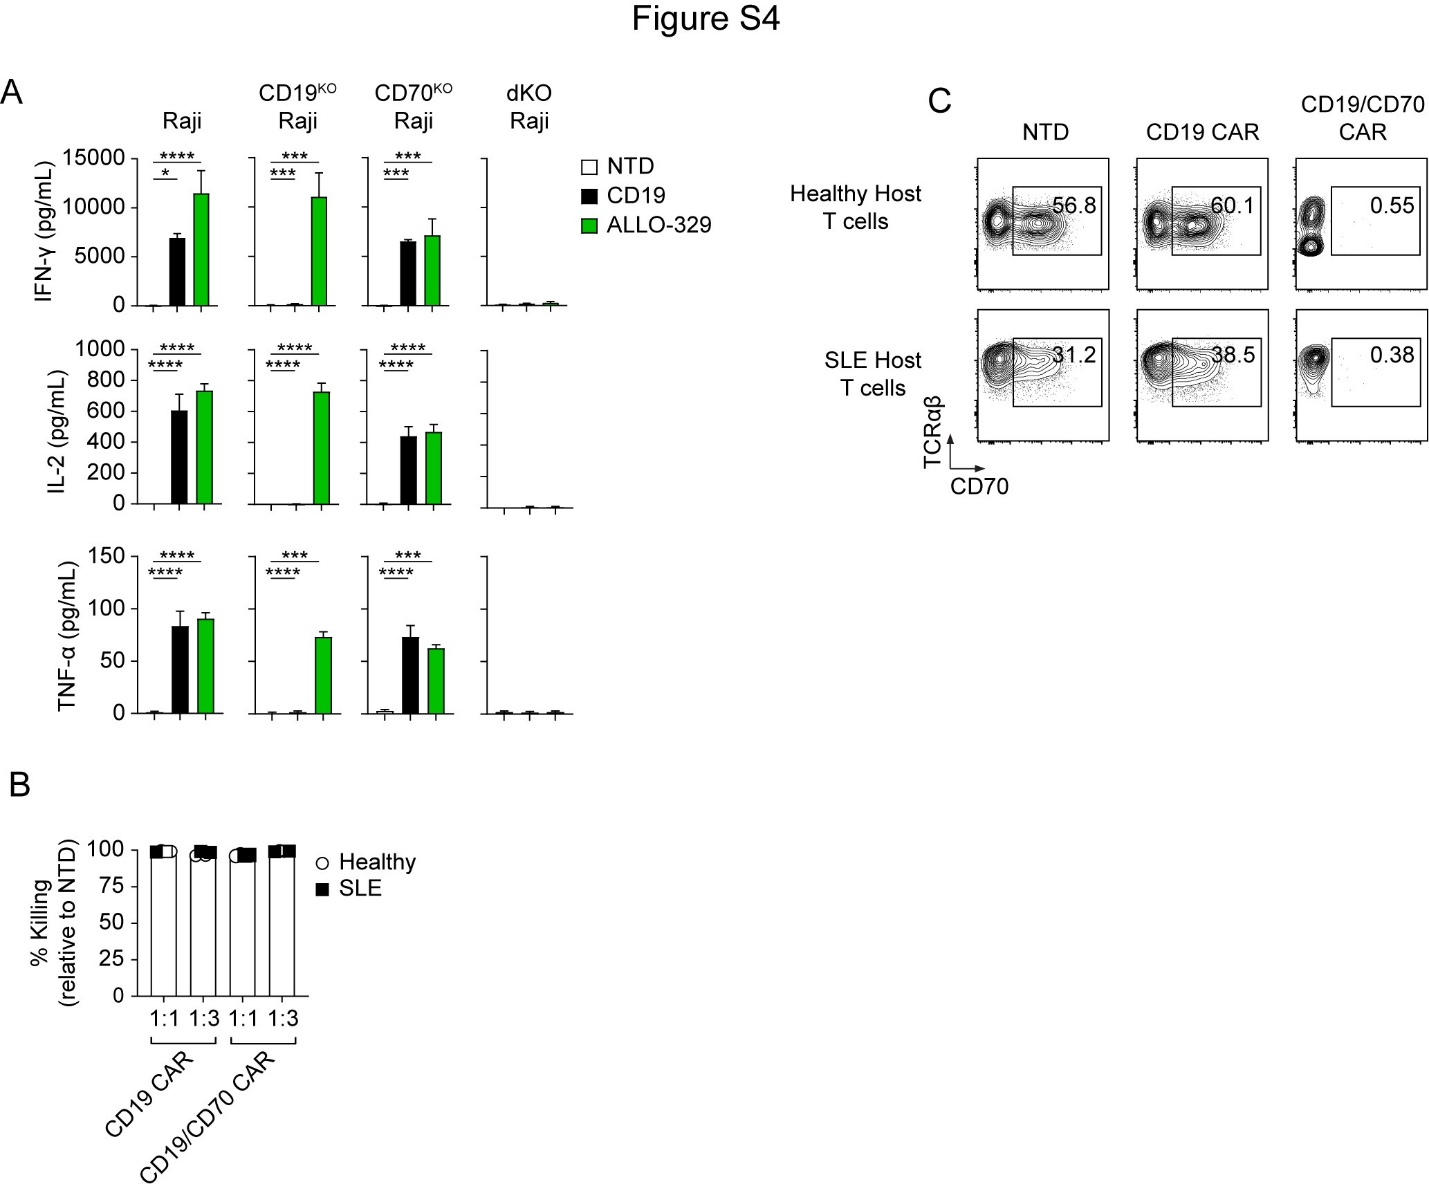


**Fig. S4. Target exposure induces cytokine production and cytotoxicity by CD19/CD70 CAR T cells.** (**A**) Cytokine levels in supernatant following target exposure for 24 hours. Data are shown as mean ± SEM of technical replicates from 2 donors tested. (**B**)Killing of CD19+ B cells from PBMCs in a 24-hour killing assay. Symbols represent unique graft-host donor pairs. (**C**)Killing of Raji target cells over multiple rounds of target exposure. Representative of 2 donors tested.(**D**) Representative flow cytometry plots showing CD70 expression on host T cells on day 6 in alloreactive T cell MLRs, shown in Figure 3.


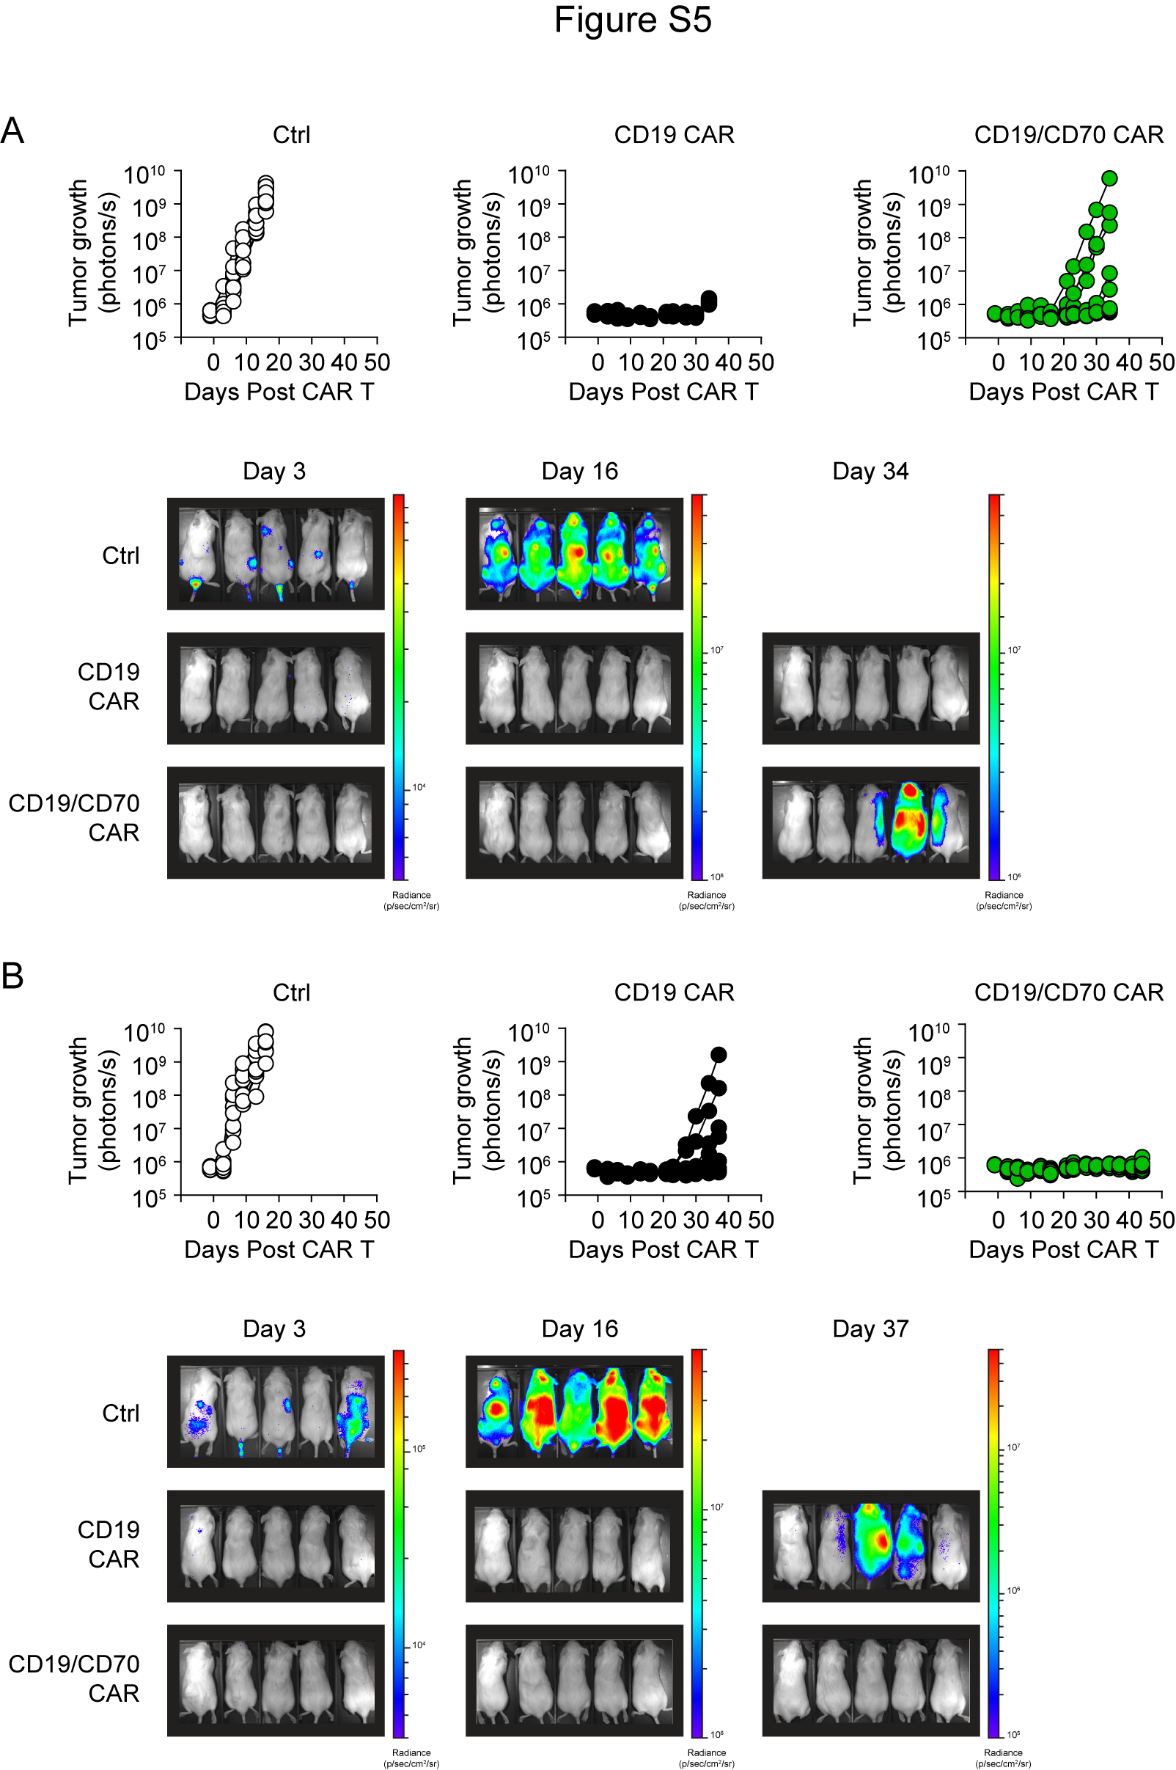


**Fig. S5. Dual targeting enhances *in vivo* CAR T cell efficacy.** (**A**) Quantification of bioluminescence from individual mice bearing CD70KO Raji tumors and representative bioluminescence images of tumor burden in control and treated mice shown in Figure 3 (n = 10). (**B**) Quantification of bioluminescence from individual mice bearing the parental Raji tumors and representative bioluminescence images of tumor burden in control and treated mice shown in Figure 3 (n = 10).


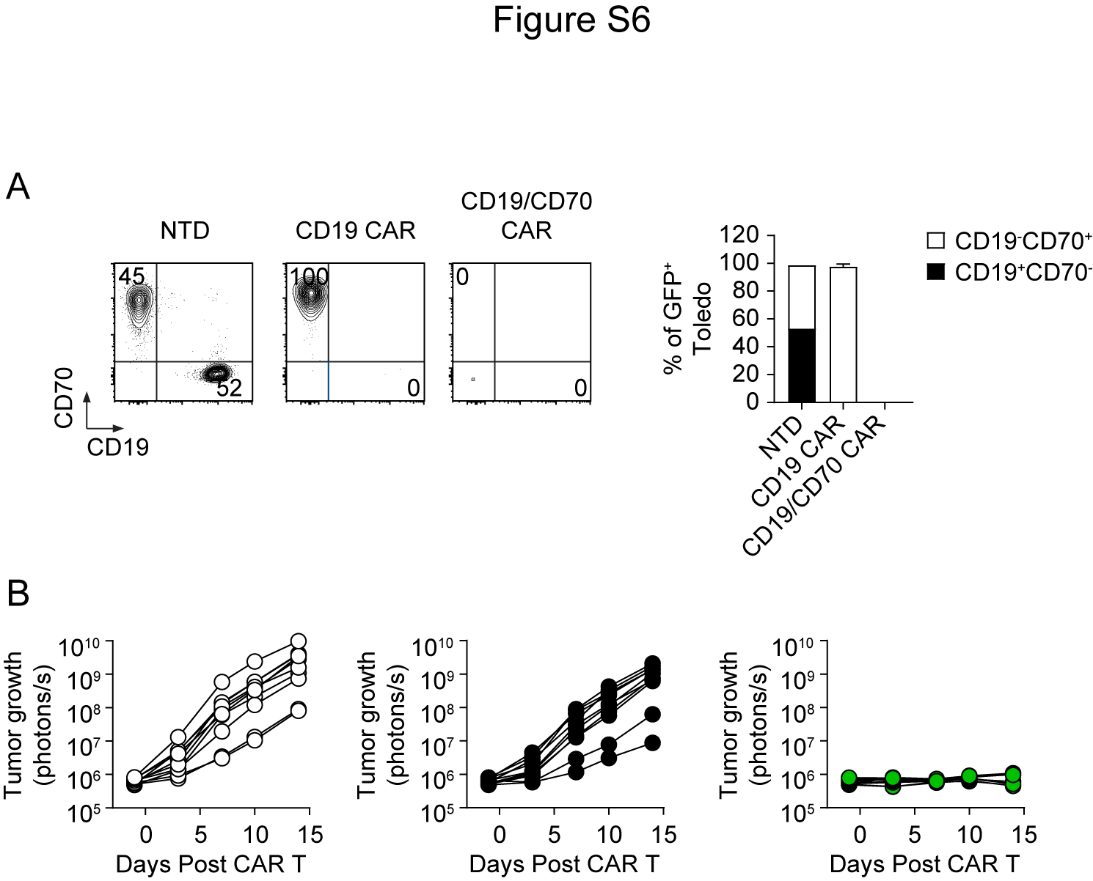


**Fig. S6. Co-expression of an anti-rejection CD70z CAR limits CD19 antigen escape in Toledo and Raji lymphoma cells.** (**A**) Representative flow cytometry plots on day 4 of CD19 and CD70 expression in mixed Toledo cell *in vitro* antigen escape assays. The percentage of CD19-CD70+ and CD19+CD70- Toledo cells are plotted for one representative donor on day 4. Data are representative of four donors tested and two independent experiments. (**B**) Quantification of bioluminescence from individual mice shown in Figure 4 (n = 10).


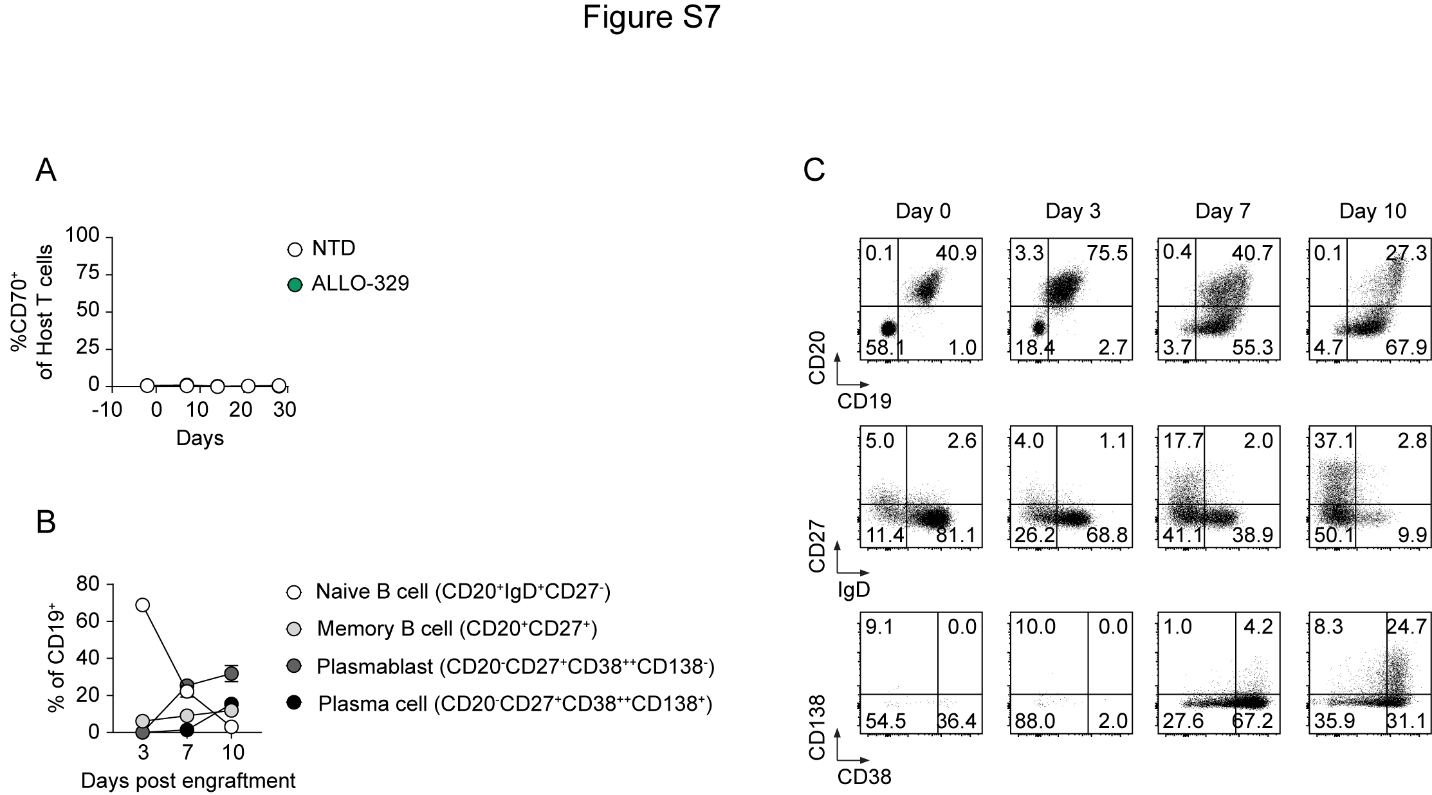


**Fig. S7. B cell differentiation and CD70 expression on host T cells in NSG mice.** (**A**) Frequency of CD70+ host T cells in the spleen of Hu-CD34 mice shown in Figure 5 (n = 3). (**B**) Frequency of CD19+ subsets in the spleen of mice over time after transfer of PBMCs into NSG mice (n = 3). (**C**) Representative flow cytometry plots of host B cells on day 10 after PBMC transfer into NSG mice (n = 3).


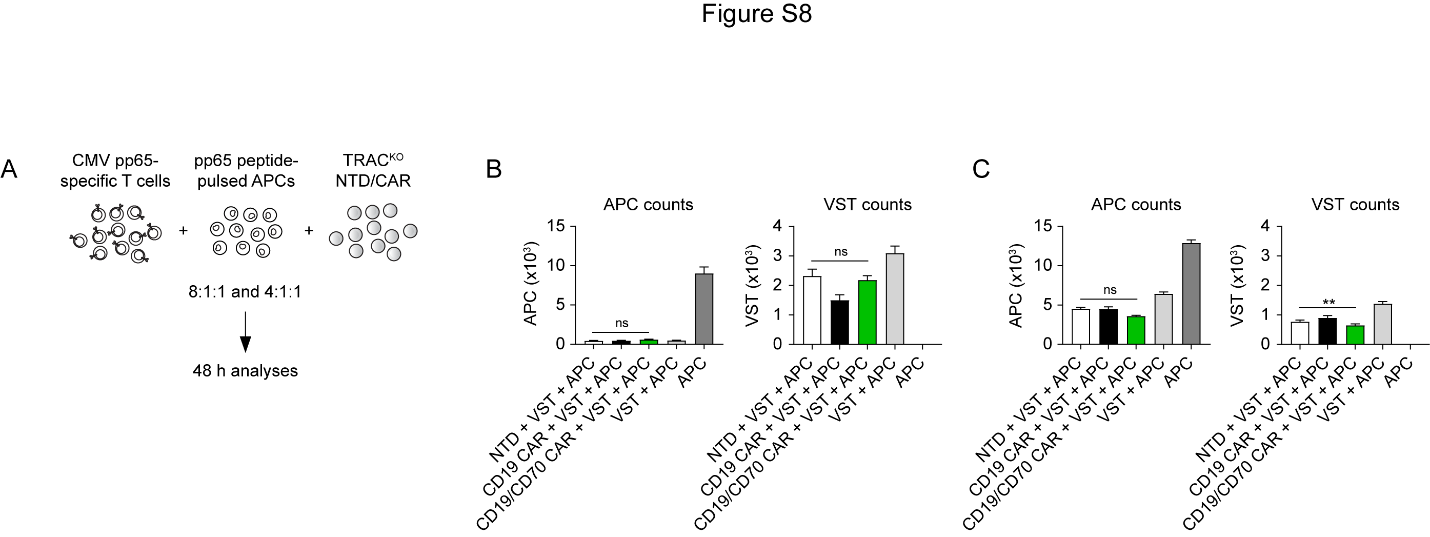


**Fig. S8. Virus-specific T cell activity is not abrogated by CD19/CD70 CAR T cells.** (**A**) Schematic of virus-specific T cell (VST) tri-culture assay. (**B**) Antigen presenting cell (APC) and VST counts from the 8:1:1 ratio at 48h. (**C**) APC and VST counts from the 4:1:1 ratio at 48h. Data are representative of three unique graft donors tested and are shown as mean ± SEM of three technical replicates.


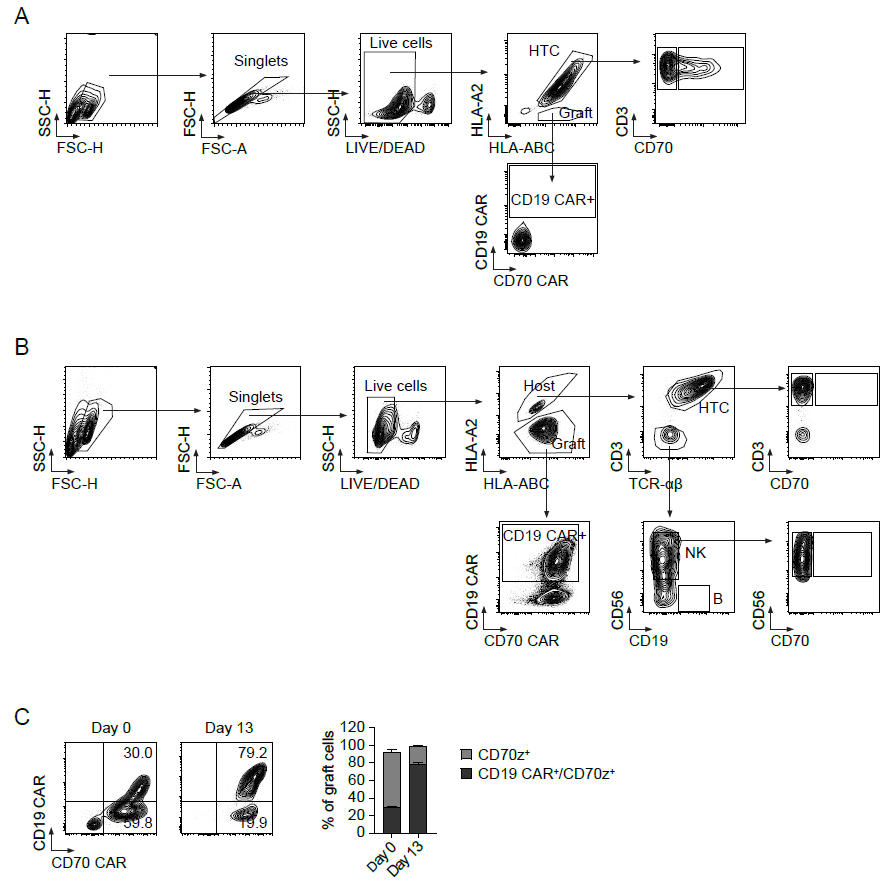


**Fig. S9. Flow cytometry gating strategy.** Flow cytometry gating strategies are shown for (**A**) alloreactive T cell MLR and (**B**) PBMC MLR assays.
